# Supplementary material
Source: PubMed Central journal article supplement (PMC6318189)
Supplement: 11606_2018_4701_MOESM2_ESM.pdf [file 11606_2018_4701_MOESM2_ESM.pdf]

### **Purpose of the interview**

We are conducting interviews with a selection of stakeholders involved in our joint research project in order to learn more about the effects of our approach to engagement. We will be interviewing roughly 15 members of the team. The data we collect will be used in a manuscript we are writing for publication in academic and other journals.

### **Confidentiality**

The Alliance for Strong Families and Communities will record the interviews, and our internal staff will review the recordings for themes and key learnings. Your interview will not be shared with anyone on the PCORI research team, but will remain in the Alliance's files. The data will be shared with the larger research team and through publication in the form of summary statements that describe the themes that surface through multiple interviews.

### **Interview format**

The director of engagement will ask a series of questions about your involvement in the research project over the phone. Different sets of questions have been created for community stakeholders, research assistants, and primary investigators; everyone within each group will receive the same questions. Please provide detailed answers to the best of your ability. Remember that your responses will not be shared outside of the Alliance's internal staff, so we encourage you to speak freely about your involvement in the project.

### **Questions for stakeholders**

1. Describe your role in the project as a stakeholder. Do the opportunities for involvement meet your expectation?
2. Do you feel like you received clear information and direction about your role?
3. Describe how the research process does or does not make you feel like a valued member of the team.
4. Do you feel like you are engaged in this project? Do you feel like your expertise is being utilized? How so?
5. Have you had prior experience with other research projects? If so, how does your experience with the current project differ from your prior experiences?
6. What were your expectations going in to this project, and have those expectations been met to date?
7. Would you participate in another research project of this kind if you had the opportunity to do so? Why?
8. What feedback or advice do you have for researchers, stakeholders, or other members of the research team?
9. Please describe how power is shared on the team. Is the power structure different than in other research projects you've led or participated in?
10. Is there anything I didn't ask about that I should have, or any other information you'd like to share?

### **Questions for Primary Investigators**

1. Please describe how power is shared on the team. Is the power structure different than in other research projects you've led or participated in?
2. Are there effective practices you've discovered through leading a project team of this nature?

Research reported in this work was funded through a Patient-Centered Outcomes Research Institute (PCORI) Award

3. Do you feel the engagement component has contributed to the overall research, whether positively or negatively? In what ways?
4. Please describe the purpose of stakeholder engagement from your perspective.
5. What were your expectations going in to this project, and have those expectations been met to date?
6. Would you participate in another research project of this kind if you had the opportunity to do so? Why?
7. What feedback or advice do you have for researchers, stakeholders, or other members of the research team?
8. Do you feel like your expertise is being utilized in this project? How so?
9. Is there anything I didn't ask about that I should have, or any other information you'd like to share?

### **Questions for Research Assistants**

1. Describe the opportunities you've had for involvement in the research project. Do these opportunities meet your expectations?
2. What were your expectations going in to this project, and have those expectations been met to date?
3. Do you feel the engagement component has contributed to the overall research, whether positively or negatively? In what ways?
4. Would you participate in another research project of this kind if you had the opportunity to do so? Why?
5. Please describe how you see power being distributed on the team. Is the power structure different than in other research projects you've led or participated in?
6. What feedback or advice do you have for researchers, stakeholders, or other members of the research team?
7. Is there anything I didn't ask about that I should have, or any other information you'd like to share?
